# Supplementary material for: Temperature-dependence of hydrogen oxidation reaction rates and CO-tolerance at carbon-supported Pt, Pt–Co, and Pt–Ru catalysts
Source: Royal Society of Chemistry journal article supplement (doi:10.1039/b811516h), 2009-01-01
Supplement: b811516h.pdf [file b811516h.pdf]

# Electronic Supporting Information for “Temperature-Dependence of Hydrogen Oxidation Reaction Rates and CO-Tolerance at Carbon-Supported Pt, Pt–Co, and Pt–Ru Catalysts”

Hiroyuki Uchida,<sup>a</sup> Kenji Izumi,<sup>a</sup> Koich Aoki,<sup>b</sup> and Masahiro Watanabe<sup>a\*</sup>

<sup>a</sup> Clean Energy Research Center, University of Yamanashi, Takeda 4, Kofu 400-8510, Japan

<sup>b</sup> Graduate School of Engineering, Fukui University, Bunkyo 3-9-1, Fukui 910-8507, Japan

## (1) Supplementary data sets for Figure 1 (hydrodynamic voltammograms)

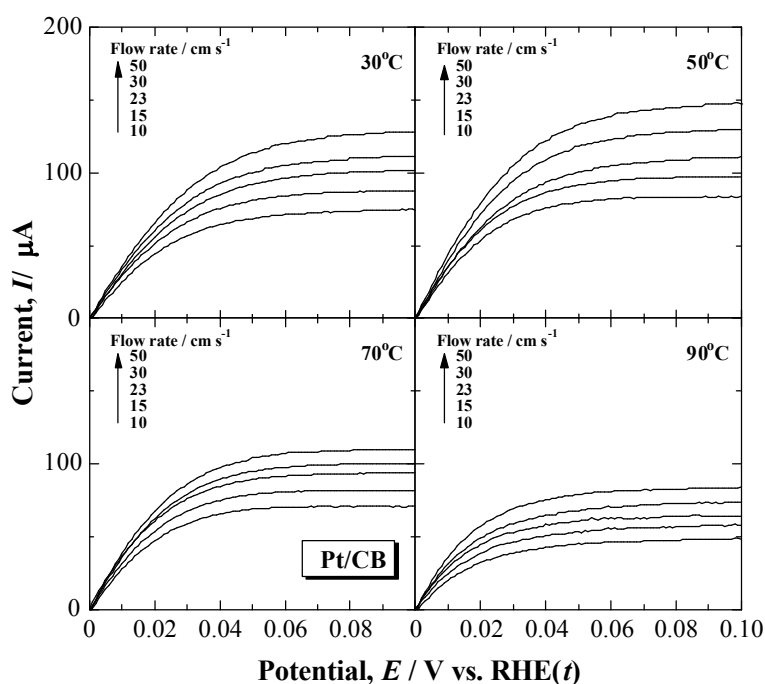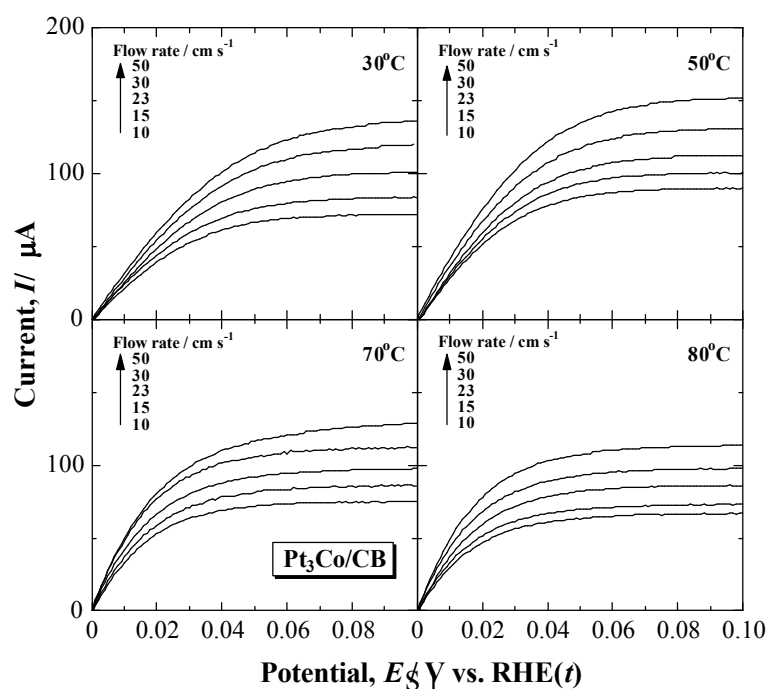

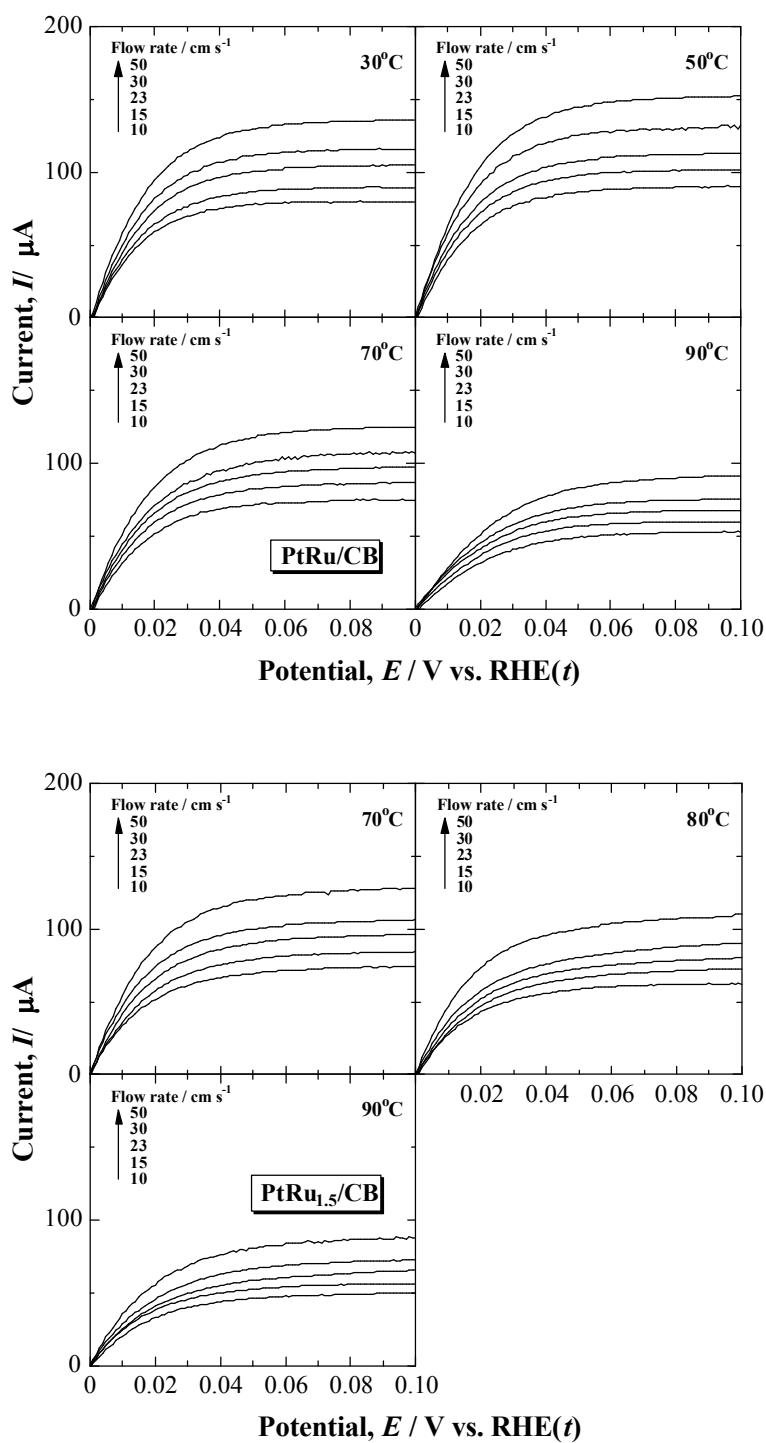

**Figure S1.** Hydrodynamic voltammograms for the HOR at Nafion-coated supported catalysts in H<sub>2</sub> saturated 0.1 M HClO<sub>4</sub> at 30 to 90 °C measured at a potential sweep rate of 0.5 mV s<sup>-1</sup> and various mean flow rates of the solution, *U*<sub>m</sub>, from 10 to 50 cm s<sup>-1</sup>.

(2) Evaluation method of kinetically controlled current  $I_K$  from  $I^{-1}$  vs.  $U_m^{-1/3}$  plot

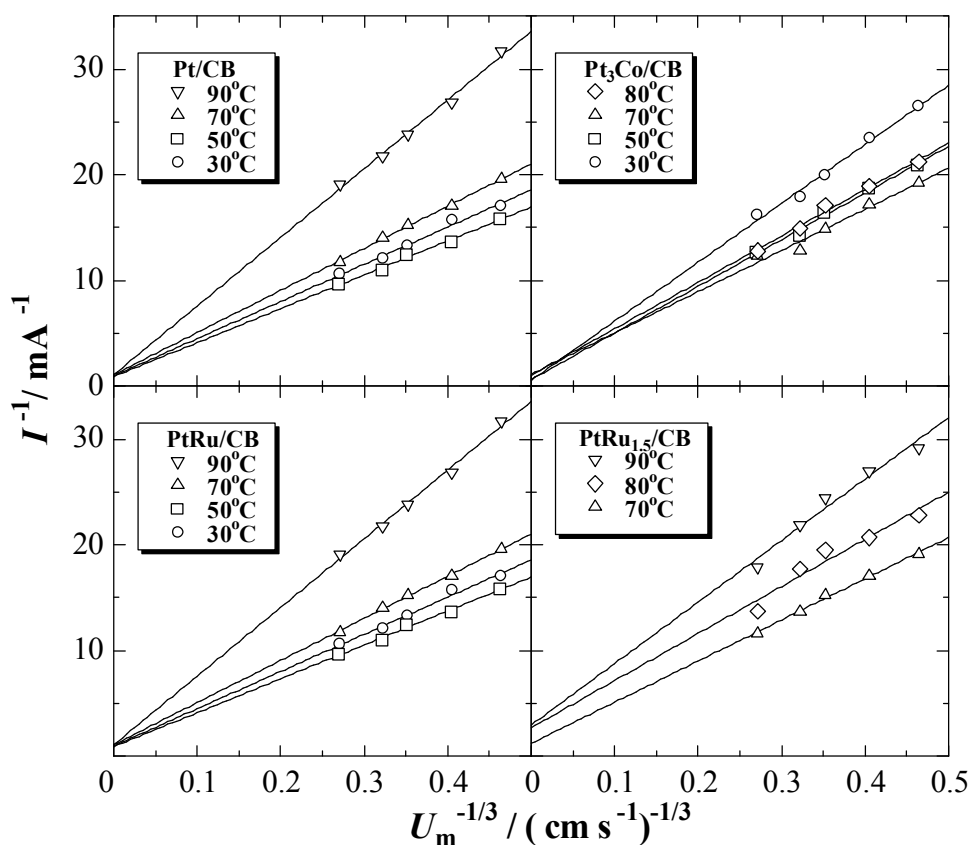

**Figure S2.**  $I^{-1}$  vs.  $U_m^{-1/3}$  plots at 0.020 V vs. RHE( $t$ ) obtained from hydrodynamic voltammograms at Nafion-coated supported catalysts in H<sub>2</sub>-saturated 0.1 M HClO<sub>4</sub> solution in the temperature range from 30 to 90 °C. Solid lines are least-squares fits. The kinetically controlled current density  $j_K$  was calculated by  $j_K = I_K/S^0$ , where  $S^0$  is the electrochemically active area of the working electrode.

(3) Supplementary data sets for Figure 5; relationship between  $\log(1-\theta_{\text{CO}})$  and  $t_{\text{ad}}$  at 50 to 90 °C.

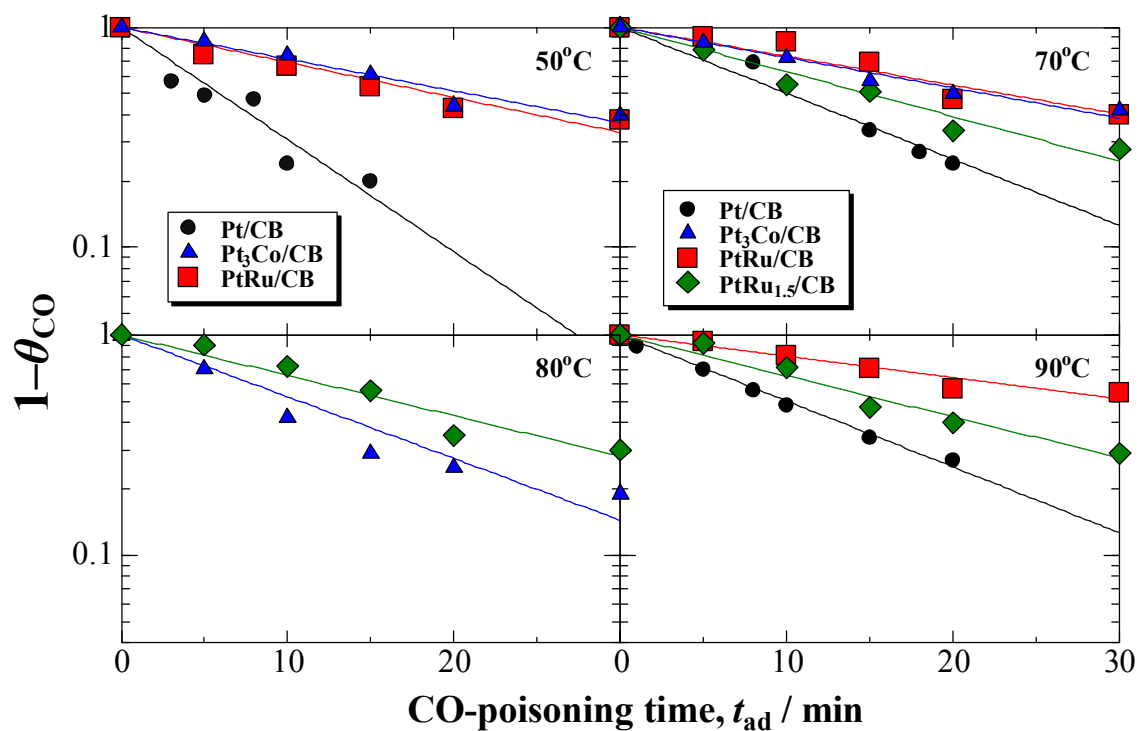

**Figure S3.** Plots of  $\log(1-\theta_{\text{CO}})$  vs.  $t_{\text{ad}}$  at various supported catalysts upon exposure to 0.1 M HClO<sub>4</sub> solution saturated with 0.30% CO (H<sub>2</sub> balance) at 0.050 V and 30°C. Solid lines are the least-squares fits.
